# Supplementary material
Source: PubMed Central journal article supplement (PMC7476357)
Supplement: NIHMS1624299-supplement-Supplementary_material.pdf [file NIHMS1624299-supplement-Supplementary_material.pdf]

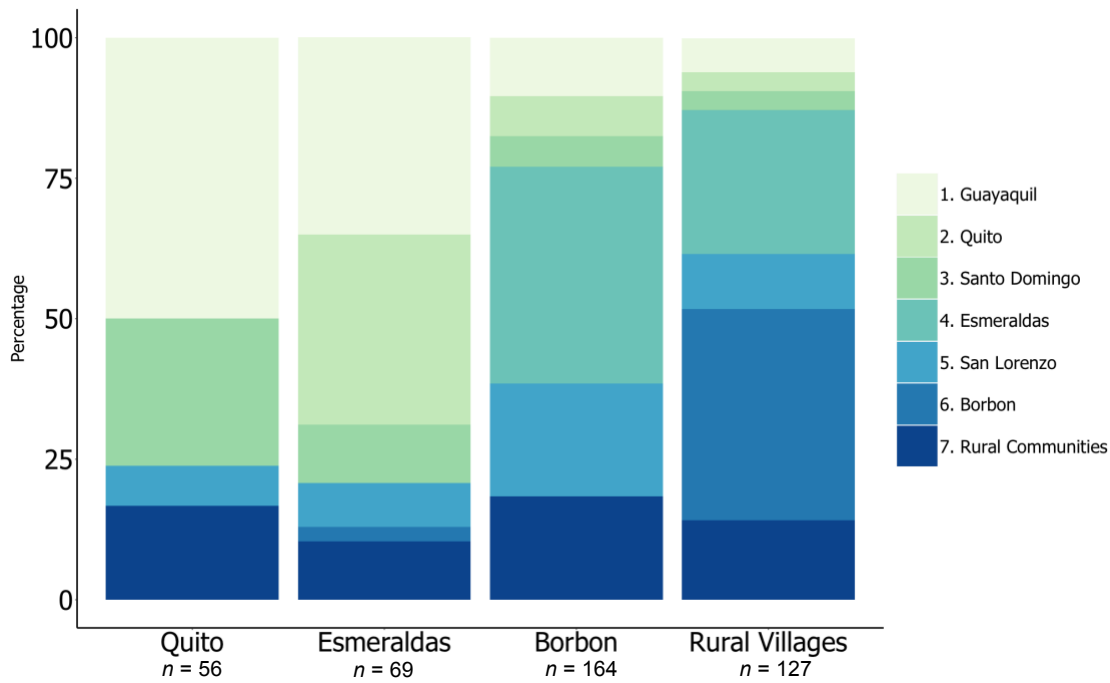

**Figure S1. Distribution of reported travel destinations visited by participants across the four study sites.** Destinations are listed in order of most populous (Guayaquil) to least populous (Rural Communities). Note the “Rural Communities” encompasses any rural area surrounding a given study site not just the rural village study location.

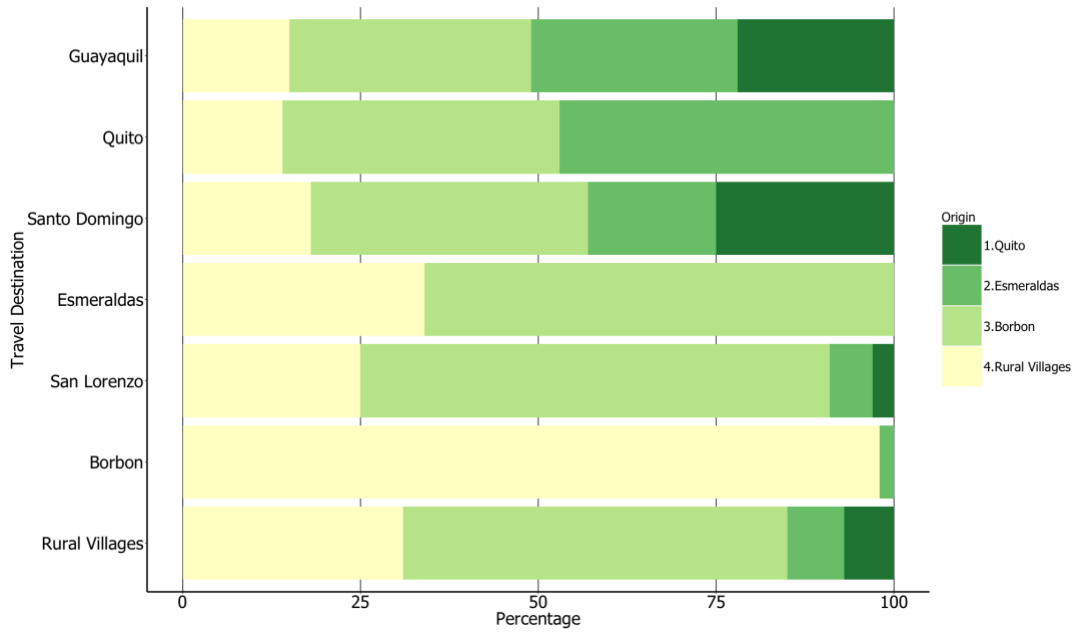

**Figure S2. Reported Domestic Travel Destination by Study Site.** Only destinations specified on the survey instrument are shown, but only 3% reported traveling to "Other" destinations. Note that reported travel to "rural villages" for Quito and Esmeraldas is not necessarily to the same rural villages as the rural study site.
